# Supplementary material
Source: publisher site journal article supplement (https://www.dovepress.com/article/217041)
Supplement: Supplementary file 1 [file get_supplementary_file.php]

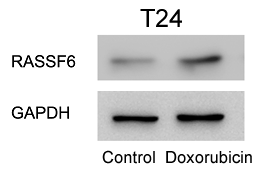


**Supplementary Figure 1**

Doxorubicin treatment slightly upregulated RASSF6 protein expression in T24 cell line.
